# Supplementary material for: Assessing the effectiveness of riparian buffers in protecting biodiversity
Source: Research Square preprint supplement (doi:10.21203/rs.3.rs-6353341/v1), 2025-05-26
Supplement: Supplementary file 1 [file 7ff46293fc439808ca687544.xlsx]

## Sheet: Datasets and Studies
Table S2. Studies and datasets included in our meta-analysis. See Column description for details of each column.
Study	Reference	Data_Source	Dataset_code	Taxa_minor	Taxa_summarized	Land_use_summarized	Overall_Region	Country	Biome	Latitude_mean	Longitude_mean	Obs.	Q1a.BufferVSNoBuffer_Div	Q1b.BufferVSNoBuffer_Comp	Q2.ReferenceVSBuffer_NoBuffer	Q3a.Buffer_size_Ref	Q3b.Buffer_size_For	Q3c.Buffer_size_Rip
1980 Newbold	Newbold, J. D., Erman, D. C., & Roby, K. B. (1980). Effects of logging on macroinvertebrates in streams with and without buffer strips. Canadian Journal of Fisheries and Aquatic Sciences, 37(7), 1076-1085.	Newbold's Dissertation	1980 Newbold	Macroinvertebrates	Aquatic Invertebrates	Logging	Temperate	US	Temperate Coniferous Forest	41.1893	-122.781		1	1	1	0	0	0
2000 Lyons	Lyons, J., Weigel, B. M., Paine, L. K., & Undersander, D. J. (2000). Influence of intensive rotational grazing on bank erosion, fish habitat quality, and fish communities in southwestern Wisconsin trout streams. Journal of Soil and Water Conservation, 55(3), 271-276.	Email	2000 Lyons	Fish	Fish	Agriculture	Temperate	US	Temperate Broadleaf & Mixed Forests	43.122	-90.311	Removed upstream sites in the same stream, as they are control sites	1	1	0	0	0	0
2000 Manel et al (Ormerod)	Manel, S., Buckton, S. T., & Ormerod, S. J. (2000). Testing large‐scale hypotheses using surveys: the effects of land use on the habitats, invertebrates and birds of Himalayan rivers. Journal of Applied Ecology, 37(5), 756-770.	Email	2000 Manel	Aquatic Invertebrates	Aquatic Invertebrates	Agriculture	Temperate	India, Nepal	Temperate Coniferous Forest; Temperate broadleaf and mixed forests	27.9	84.25	From the original data received, we did the following filter: 1) Filtered Catchment Land use. Summed Agriculture and Pasture and filtered to be 2 or more scores. 2) Filtered Riparian Tree cover. 0 or 1 riparian cover categories (absent or sparse) were NoBuffer. And 8-10 scores were continuous tree cover on both stream sites - Riparian Buffer category.	1	1	0	0	0	0
2000 Stauffer	Stauffer, J. C., Goldstein, R. M., & Newman, R. M. (2000). Relationship of wooded riparian zones and runoff potential to fish community composition in agricultural streams. Canadian Journal of Fisheries and Aquatic Sciences, 57(2), 307-316.	Email	2000 Stauffer	Fish	Fish	Agriculture	Temperate	US	Transition - Temperate Grasslands, Savannas, and Shrublands	44.406	-94.318	Transition between temperate Shrublands and temperate forest	1	1	0	0	0	0
2000 Weigel	Weigel, B. M., Lyons, J., Paine, L. K., Dodson, S. I., & Undersander, D. J. (2000). Using stream macroinvertebrates to compare riparian land use practices on cattle farms in southwestern Wisconsin. Journal of Freshwater Ecology, 15(1), 93-106.	Email	2000 Weigel	Macroinvertebrates	Aquatic Invertebrates	Agriculture	Temperate	US	Temperate Broadleaf & Mixed Forests	43.122	-90.311	Removed upstream sites in the same stream, as they are control sites	1	1	0	0	0	0
2002 Rowe	Rowe, D. K., Smith, J., Quinn, J., & Boothroyd, I. (2002). Effects of logging with and without riparian strips on fish species abundance, mean size, and the structure of native fish assemblages in Coromandel, New Zealand, streams. New Zealand Journal of Marine and Freshwater Research, 36(1), 67-79.	Email	2002 Rowe et al	Fish	Fish	Silviculture	Temperate	New Zealand	Temperate Broadleaf & Mixed Forests	-36.7975	175.614		1	1	1	0	0	0
2002 Vesely	Vesely, D. G., & McComb, W. C. (2002). Salamander abundance and amphibian species richness in riparian buffer strips in the Oregon Coast Range. Forest Science, 48(2), 291-297.	Email	2002 Vesely et al	Amphibian	Amphibian	Logging	Temperate	US	Temperate Coniferous Forest	44.746	-123.686		1	1	1	1	1	0
2003 Cockle Richardson	Cockle, K. L., & Richardson, J. S. (2003). Do riparian buffer strips mitigate the impacts of clearcutting on small mammals?. Biological Conservation, 113(1), 133-140.	Email	2003 Cockle Richardson Small mammal Logging	Small mammals	Small mammal	Logging	Temperate	Canada	Temperate Coniferous Forest	49.267	-122.567		0	0	1	0	0	0
2003 Monkkonen Mutanen	Mönkkönen, M., & Mutanen, M. (2003). Occurrence of moths in boreal forest corridors. Conservation Biology, 17(2), 468-475.	Email	2003 Monkkonen & Mutanen	Moths	Terrestrial invertebrates	Silviculture	Temperate	Finland	Boreal Forests/Taiga	65.5	28	Removed buffer edge treatment, to keep only sites inside the buffer and near the water	1	1	1	0	0	0
2004 Hylander et al	Hylander, K., Nilsson, C., & Göthner, T. (2004). Effects of buffer‐strip retention and clearcutting on land snails in boreal riparian forests. Conservation Biology, 18(4), 1052-1062.	Email	2004 Hylander et al	Land snails	Terrestrial invertebrates	Logging	Temperate	Sweden	Boreal Forests/Taiga	62.667	16.083	Clearcut experiment, used postlogging data only	1	1	1	0	0	0
2004 Miller et al	Miller, D. A., Thill, R. E., Melchiors, M. A., Wigley, T. B., & Tappe, P. A. (2004). Small mammal communities of streamside management zones in intensively managed pine forests of Arkansas. Forest Ecology and Management, 203(1-3), 381-393.	Email	2004 Miller et al	Small mammal	Small mammal	Silviculture	Temperate	US	Temperate Broadleaf & Mixed Forests	34.563	-93.059		1	1	1	0	0	0
2004 Quinn et al	Quinn, J. M., Boothroyd, I. K., & Smith, B. J. (2004). Riparian buffers mitigate effects of pine plantation logging on New Zealand streams: 2. Invertebrate communities. Forest Ecology and Management, 191(1-3), 129-146.	Email	2004 Quinn et al Logging	Macroinvertebrates	Aquatic Invertebrates	Logging	Temperate	New Zealand	Temperate Broadleaf & Mixed Forests	-36.8023	175.614		1	1	1	1	0	0
2004 Quinn et al	Quinn, J. M., Boothroyd, I. K., & Smith, B. J. (2004). Riparian buffers mitigate effects of pine plantation logging on New Zealand streams: 2. Invertebrate communities. Forest Ecology and Management, 191(1-3), 129-146.	Email	2004 Quinn et al Silviculture	Macroinvertebrates	Aquatic Invertebrates	Silviculture	Temperate	New Zealand	Temperate Broadleaf & Mixed Forests	-36.7998	175.6		1	1	1	0	0	0
2006 Martin et al	Martin, T. G., McIntyre, S., Catterall, C. P., & Possingham, H. P. (2006). Is landscape context important for riparian conservation? Birds in grassy woodland. Biological Conservation, 127(2), 201-214.	Email	2006 Martin et al	Birds	Bird	Cropland	Temperate	Australia	Temperate Broadleaf & Mixed Forests	-27	152		1	1	1	0	0	0
2006 Martin et al	Martin, T. G., McIntyre, S., Catterall, C. P., & Possingham, H. P. (2006). Is landscape context important for riparian conservation? Birds in grassy woodland. Biological Conservation, 127(2), 201-214.	Email	2006 Martin et al	Birds	Bird	Pasture	Temperate	Australia	Temperate Broadleaf & Mixed Forests	-27	152	Removed R-W treatment, which is riparian impacted in forest landscape.	1	1	1	0	0	0
2006 Perkins Hunters	Perkins, D. W., & Hunter Jr, M. L. (2006). Effects of riparian timber management on amphibians in Maine. The Journal of Wildlife Management, 70(3), 657-670.	Email	2006 Perkins and Hunters	Amphibians	Amphibian	Logging	Temperate	US	Temperate Broadleaf & Mixed Forests	45.417	-70.583	Both terrestrial amphibians sampled with pitfall and aquatic sampling turning rocks on the stream bottom were included. Pre-logging in 2001 was not included. Only downstream harvesting sites were included. Upstream sites without logging were not included.	1	1	1	0	0	0
2007 Feld Hering	Feld, C. K., & Hering, D. (2007). Community structure or function: effects of environmental stress on benthic macroinvertebrates at different spatial scales. Freshwater Biology, 52(7), 1380-1399.	Email	2007 Feld Hering	Macroinvertebrates	Aquatic Invertebrates	Agriculture	Temperate	Germany, Netherlands	Temperate Broadleaf & Mixed Forests	52.4167	8.48415	Agriculture = At least 70% of cropland+pasture land use (less and 30% of native forest) in the catchment. Reference catchments >=70% forest cover and >70% riparian density. NoBuffer = Riparian woody density =< 20% and width < 2m; Buffer >= 70% e >10m. Keep only Germany and Netherlands sites as they are closer spatially and have enough riparian and landscape contrasts.	1	1	1	0	0	0
2007 Moldenke Linden	Moldenke, A. R., & Ver Linden, C. (2007). Effects of clearcutting and riparian buffers on the yield of adult aquatic macroinvertebrates from headwater streams. Forest Science, 53(2), 308-319.	Email	2007 Moldenke	EPT	EPT	Logging	Temperate	US	Temperate Coniferous Forest	44.4361	-122.272	One TCc site was removed for sampling issues	1	1	1	0	0	0
2007 Rykken et al	Rykken, J. J., Moldenke, A. R., & Olson, D. H. (2007). Headwater riparian forest‐floor invertebrate communities associated with alternative forest management practices. Ecological Applications, 17(4), 1168-1183.	Email	2007 Rykken et al	Terrestrial invertebrates	Terrestrial invertebrates	Logging	Temperate	US	Temperate Coniferous Forest	44.4361	-122.272		1	1	1	0	0	0
2008 Lees & Peres	Lees, A. C., & Peres, C. A. (2008). Conservation value of remnant riparian forest corridors of varying quality for Amazonian birds and mammals. Conservation Biology, 22(2), 439-449.	Email	2008 Lees & Peres Bird Agriculture	Birds	Bird	Agriculture	Tropical	Brazil	Tropical & Subtropical Moist Broadleaf Forests	-9.87215	-55.7147	Summarized data by stream as: Mean buffer size of sites 3-6 (removed sites 1-2 from each stream as they were located in big fragments). Coordinates were also averaged. Species individuals were summed by stream. Control sites are riparian sites conected to big fragments >1500m wide	0	0	0	1	1	1
2008 Lees & Peres	Lees, A. C., & Peres, C. A. (2008). Conservation value of remnant riparian forest corridors of varying quality for Amazonian birds and mammals. Conservation Biology, 22(2), 439-449.	Email	2008 Lees & Peres Large mammal Agriculture	Large mammals	Large mammal	Agriculture	Tropical	Brazil	Tropical & Subtropical Moist Broadleaf Forests	-9.87215	-55.7147	Summarized data by stream as: Mean buffer size of sites 3-6 (removed sites 1-2 from each stream as they were located in big fragments). Coordinates were also averaged. Species individuals were summed by stream. Control sites are riparian sites conected to big fragments >1500m wide	0	0	0	1	1	0
2009 Casatti et al	Casatti, L., de Paula Ferreira, C., & Carvalho, F. R. (2009). Grass-dominated stream sites exhibit low fish species diversity and dominance by guppies: an assessment of two tropical pasture river basins. Hydrobiologia, 632, 273-283.	Email	2009 Casatti et al	Fish	Fish	Pasture	Tropical	Brazil	Tropical & Subtropical Moist Broadleaf Forests	-20.4965	-50.0157	Buffer = at least 80% of woody vegetation and >50% of forest on margins, canopy cover class = 2-4 and >5% total riparian forest cover. NoBuffer = 0% of WoodyCover on margins, canopy class = 0 or 1, forest cover in total riparian buffer = <3%. Used data of both 2009 Casatti and 2015 Casatti to filters sites.	1	1	0	0	0	0
2009 Ficetola	Ficetola, G. F., Padoa‐Schioppa, E. M. I. L. I. O., & De Bernardi, F. (2009). Influence of landscape elements in riparian buffers on the conservation of semiaquatic amphibians. Conservation Biology, 23(1), 114-123.	Email	2009 Ficetola	Amphibians	Amphibian	Urban	Temperate	Italy	Temperate Coniferous Forests	45.7626	9.10924	NoBuffer = <20%forest buffer100m, less than 30% forest buff1500m. Buffer >80% forest 100m, <30% forest 1500m. Reference > 70% forest 1500m and >80% buffer 100m.	1	0	1	0	0	0
2009 Lorion Kennedy Fish	Lorion, C. M., & Kennedy, B. P. (2009). Riparian forest buffers mitigate the effects of deforestation on fish assemblages in tropical headwater streams. Ecological Applications, 19(2), 468-479.	Email	2009 Lorion Fish	Fish	Fish	Pasture	Tropical	Costa Rica	Tropical & Subtropical Moist Broadleaf Forests	9.583	-82.667		1	1	1	0	0	0
2009 Lorion Kennedy Macro	Lorion, C. M., & Kennedy, B. P. (2009). Relationships between deforestation, riparian forest buffers and benthic macroinvertebrates in neotropical headwater streams. Freshwater Biology, 54(1), 165-180.	Email	2009 Lorion Macro	Macroinvertebrates	Aquatic Invertebrates	Pasture	Tropical	Costa Rica	Tropical & Subtropical Moist Broadleaf Forests	9.583	-82.667		1	1	1	0	0	0
2010 Rodriguez-Mendoza & Pineda	Rodríguez-Mendoza, C., & Pineda, E. (2010). Importance of riparian remnants for frog species diversity in a highly fragmented rainforest. Biology Letters, 6(6), 781-784.	Email	2010 Rodriguez-Mendoza & Pineda	Frogs	Amphibian	Pasture	Tropical	Mexico	Tropical & Subtropical Moist Broadleaf Forests	18.5953	-95.0745		1	1	0	0	0	0
2010 Wilk et al	Wilk, R. J., Raphael, M. G., Nations, C. S., & Ricklefs, J. D. (2010). Initial response of small ground-dwelling mammals to forest alternative buffers along headwater streams in the Washington Coast Range, USA. Forest Ecology and Management, 260(9), 1567-1578.	Email	2010 Wilk et al	Small mammals	Small mammal	Logging	Temperate	US	Temperate Coniferous Forest	46.696	-123.284		1	1	1	0	0	0
2010 Wilkerson et al	Wilkerson, E., Hagan, J. M., & Whitman, A. A. (2010). The effectiveness of different buffer widths for protecting water quality and macroinvertebrate and periphyton assemblages of headwater streams in Maine, USA. Canadian Journal of Fisheries and Aquatic Sciences, 67(1), 177-190.	Email	2010 Wilkerson	Macroinvertebrates	Aquatic Invertebrates	Logging	Temperate	US	Temperate Broadleaf & Mixed Forests	45	-70.333		1	1	1	1	0	0
2011 Perry et al	Perry, R. W., Wigley, T. B., Melchiors, M. A., Thill, R. E., Tappe, P. A., & Miller, D. A. (2011). Width of riparian buffer and structure of adjacent plantations influence occupancy of conservation priority birds. Biodiversity and Conservation, 20, 625-642.	Email	2011 Perry et al	Birds	Bird	Logging	Temperate	US	Temperate Broadleaf & Mixed Forests	34.569	-93.056		1	1	1	1	1	0
2011 Saly et al	Sály, P., Takács, P., Kiss, I., Bíró, P., & Erős, T. (2011). The relative influence of spatial context and catchment‐and site‐scale environmental factors on stream fish assemblages in a human‐modified landscape. Ecology of Freshwater Fish, 20(2), 251-262.	Email	2011 Saly et al	Fish	Fish	Agriculture	Temperate	Hungary	Temperate Broadleaf & Mixed Forests	46.766	17.1766	Filtered data: Only watersheds >50% agriculture <40% forest; Only watersheds <5% urban; Watersheds >20km2 area; Sum Forests Riparian buffer > 70% was classified as Buffer; Sum Agriculture and other LU > 70% NoBuffer	1	1	0	0	0	0
2011 Storey et al	Storey, R. G., Parkyn, S., Neale, M. W., Wilding, T., & Croker, G. (2011). Biodiversity values of small headwater streams in contrasting land uses in the Auckland region. New Zealand Journal of Marine and Freshwater Research, 45(2), 231-248.	Email	2011 Storey et al	Macroinvertebrates	Aquatic Invertebrates	Pasture	Temperate	New Zealand	Temperate Broadleaf & Mixed Forests	-36.7933	174.726		1	1	1	0	0	0
2012 Casatti et al	Casatti, L., Teresa, F. B., Gonçalves-Souza, T., Bessa, E., Manzotti, A. R., Gonçalves, C. D. S., & Zeni, J. D. O. (2012). From forests to cattail: how does the riparian zone influence stream fish?. Neotropical Ichthyology, 10, 205-214.	Email	2012 Casatti et al	Fish	Fish	Agriculture	Tropical	Brazil	Tropical & Subtropical Moist Broadleaf Forests	-20.8282	-49.2076	Removed intermediate sites to have onlt PREserved = Riparian buffer and DEGraded = NoBuffer	1	1	0	0	0	0
2012 Teresa Casatti	Teresa, F. B., & Casatti, L. (2012). Influence of forest cover and mesohabitat types on functional and taxonomic diversity of fish communities in Neotropical lowland streams. Ecology of Freshwater Fish, 21(3), 433-442.	Paper	2012 Teresa and Casatti	Fish	Fish	Agriculture	Tropical	Brazil	Tropical & Subtropical Moist Broadleaf Forests	-20.6365	-49.957		1	1	0	0	0	0
2013 Bisson et al	Bisson, P. A., Claeson, S. M., Wondzell, S. M., Foster, A. D., & Steel, A. (2013). Evaluating headwater stream buffers: lessons learned from watershed-scale experiments in southwest Washington. Density management in the 21st century: west side story. General Technical Report PNW-GTR-880. US Department of Agriculture, Forest Service, Pacific Northwest Research Station, Portland, OR, 169-188.	Email	2013 Bisson et al	Macroinvertebrates	Aquatic Invertebrates	Logging	Temperate	US	Temperate Coniferous Forest	46.8002	-123.434	Experiment with logging. Used only post-logging data. Filtered for 2006 only data for consistency.	1	1	1	0	0	0
2013 Foster & Ziegltrum	Foster, A. D., & Ziegltrum, J. (2013). Riparian-associated gastropods in western Washington: community composition and the effects of forest management. Northwest Science, 87(3), 243-256.	Email	2013 Foster & Ziegltrum	Land snail	Terrestrial invertebrates	Logging	Temperate	US	Temperate Coniferous Forests	46.75	-123.476		1	1	1	0	0	0
2013 Reid et al	Reid, D. J., Lake, P. S., & Quinn, G. P. (2013). Influences of agricultural landuse and seasonal changes in abiotic conditions on invertebrate colonisation of riparian leaf detritus in intermittent streams. Aquatic Sciences, 75, 285-297.	Email	2013 Reid et al	Macroinvertebrates	Aquatic Invertebrates	Agriculture	Temperate	Australia	Temperate Broadleaf & Mixed Forests	-36.6917	145.297		1	1	0	0	0	0
2014 Gray et al	Gray, C. L., Slade, E. M., Mann, D. J., & Lewis, O. T. (2014). Do riparian reserves support dung beetle biodiversity and ecosystem services in oil palm‐dominated tropical landscapes?. Ecology and Evolution, 4(7), 1049-1060.	Email	2014 Gray et al	Dung beetles	Terrestrial invertebrates	Cropland	Tropical	Malaysia	Tropical & Subtropical Moist Broadleaf Forests	4.646	117.555		1	1	1	1	0	0
2014 Keck et al	Keck, B. P., Marion, Z. H., Martin, D. J., Kaufman, J. C., Harden, C. P., Schwartz, J. S., & Strange, R. J. (2014). Fish functional traits correlated with environmental variables in a temperate biodiversity hotspot. PLoS One, 9(3), e93237.	Email	2014 Keck et al	Fish	Fish	Agriculture	Temperate	US	Temperate Broadleaf & Mixed Forests	36.0386	-83.5533	Filters on original data: Agriculture site: Less than 40% forest; More than 40% Agriculture. NoBuffer = Less than 30% Forest Cover. Buffer = more than 70% Forest Cover. Reference sites = more thant 80% forest cover in the catchement and more than 80% cover in the riparian	1	1	1	0	0	0
2014 Stockan et al	Stockan, J. A., Baird, J., Langan, S. J., Young, M. R., & Iason, G. R. (2014). Effects of riparian buffer strips on ground beetles (Coleoptera, Carabidae) within an agricultural landscape. Insect Conservation and Diversity, 7(2), 172-184.	Email	2014 Stockan et al	Ground beetles	Terrestrial invertebrates	Agriculture	Temperate	Scotland	Temperate Broadleaf & Mixed Forests, Temperate Coniferous Forest	57.3014	-2.49143		1	1	0	0	0	0
2014 Viegas et al	Viegas, G., Stenert, C., Schulz, U. H., & Maltchik, L. (2014). Dung beetle communities as biological indicators of riparian forest widths in southern Brazil. Ecological Indicators, 36, 703-710.	Email	2014 Viegas et al	Dung beetles	Terrestrial invertebrates	Agriculture	Tropical	Brazil	Tropical & Subtropical Moist Broadleaf Forests	-29.5753	-50.5651	Buffer width class <5m was considered as NoBuffer. Average of riparian width class was used as measure of width	1	1	0	0	0	0
2015 Ferreira et al	Ferreira, V., Larrañaga, A., Gulis, V., Basaguren, A., Elosegi, A., Graça, M. A., & Pozo, J. (2015). The effects of eucalypt plantations on plant litter decomposition and macroinvertebrate communities in Iberian streams. Forest Ecology and Management, 335, 129-138.	Paper	2015 Ferreira et al	Macroinvertebrates	Aquatic Invertebrates	Silviculture	Temperate	Spain	Temperate Broadleaf & Mixed Forests	43.3027	-3.2712	Used only spain streams as both treatments are located in altered matrix agriculture/silviculture	1	1	0	0	0	0
2015 Giam et al	Giam, X., Hadiaty, R. K., Tan, H. H., Parenti, L. R., Wowor, D., Sauri, S., ... & Wilcove, D. S. (2015). Mitigating the impact of oil‐palm monoculture on freshwater fishes in Southeast Asia. Conservation Biology, 29(5), 1357-1367.	Paper	2015 Giam et al	Fish	Fish	Cropland	Tropical	Indonesia	Tropical & Subtropical Moist Broadleaf Forests	-1.63	112.566		1	1	0	0	0	0
2015 Gray et al	Gray, C. L., Lewis, O. T., Chung, A. Y., & Fayle, T. M. (2015). Riparian reserves within oil palm plantations conserve logged forest leaf litter ant communities and maintain associated scavenging rates. Journal of Applied Ecology, 52(1), 31-40.	FigShare	2015 Gray et al	Ants	Terrestrial invertebrates	Cropland	Tropical	Malaysia	Tropical & Subtropical Moist Broadleaf Forests	4.625	117.552		1	1	1	1	0	0
2015 Valente-Neto et al	Valente-Neto, F., Koroiva, R., Fonseca-Gessner, A. A., & Roque, F. D. O. (2015). The effect of riparian deforestation on macroinvertebrates associated with submerged woody debris. Aquatic Ecology, 49, 115-125.	Email	2015 Valente-Neto et al EXPERIMENT	Macroinvertebrates	Aquatic Invertebrates	Agriculture	Tropical	Brazil	Transition - Tropical & Subtropical Grasslands, Savannas & Shrublands	-21.9508	-47.8872	Savannah-Tropical Forest transition. Riparian quality classified with RCE. Filtered data as RCE> 140 Buffer; RCE<90 NoBuffer	1	0	0	0	0	0
2015 Valente-Neto et al	Valente-Neto, F., Koroiva, R., Fonseca-Gessner, A. A., & Roque, F. D. O. (2015). The effect of riparian deforestation on macroinvertebrates associated with submerged woody debris. Aquatic Ecology, 49, 115-125.	Email	2015 Valente-Neto et al OBSERVATIONAL	Macroinvertebrates	Aquatic Invertebrates	Agriculture	Tropical	Brazil	Transition - Tropical & Subtropical Grasslands, Savannas & Shrublands	-21.9508	-47.8872	Savannah-Tropical Forest transition. Riparian quality classified with RCE. Filtered data as RCE> 140 Buffer; RCE<90 NoBuffer	1	1	0	0	0	0
2017 Pond et al	Pond, G. J., Krock, K. J., Cruz, J. V., & Ettema, L. F. (2017). Effort-based predictors of headwater stream conditions: comparing the proximity of land use pressures and instream stressors on macroinvertebrate assemblages. Aquatic Sciences, 79, 765-781.	Email	2017 Pond at el	Macroinvertebrates	Aquatic Invertebrates	Urban	Temperate	US	Temperate Broadleaf & Mixed Forests	40.0744	-80.6536	Catchments were at leat 60% of antropic land use (development). NoBuffer = *less than 20% forest cover in riparian buffer land use - 100m buffer % forest 200m long. Buffer = *More than 58% forest cover in riparian buffer land use - 100m buffer % forest 200m long. Reference = native forest catchments	1	1	1	0	0	0
2017 Zimbres et al	Zimbres, B., Peres, C. A., & Machado, R. B. (2017). Terrestrial mammal responses to habitat structure and quality of remnant riparian forests in an Amazonian cattle-ranching landscape. Biological Conservation, 206, 283-292.	Email	2017 Zimbres et al Large mammal Pasture	Large mammals	Large mammal	Pasture	Tropical	Brazil	Tropical & Subtropical Moist Broadleaf Forests	-9.81791	-56.2666	Used stream as replication. Stream transects were averaged for environmental variables and summed for community occurrences. ALL SITES HAVE FOREST BUFFERS. Buffers were classified as: BUFFER_REF = less than 100 of riparian degradation; BUFFER_INT = 10 to 40% of riparian degradation; BUFFER_DIS = >50% of riparian buffer degradations	0	0	0	0	1	0
2018 Hette-Tronquart et al	Hette-Tronquart, N., Oberdorff, T., Tales, E., Zahm, A., & Belliard, J. (2018). Biological impacts of local vs. regional land use on a small tributary of the Seine River (France): insights from a food web approach based on stable isotopes. Environmental Science and Pollution Research, 25, 23583-23594.	Paper	2018 Hette-Tronquart et al	Fish	Fish	Agriculture	Temperate	France	Temperate Broadleaf & Mixed Forests	48.64	2.073	Kept only the sites with less than 50% Forest cover in the watershed. Buffer is >60% Forest. NoBuffer is < 30% Forest	1	1	0	0	0	0
2018 Leal et al	Leal, C. G., Barlow, J., Gardner, T. A., Hughes, R. M., Leitão, R. P., Mac Nally, R., ... & Pompeu, P. S. (2018). Is environmental legislation conserving tropical stream faunas? A large‐scale assessment of local, riparian and catchment‐scale influences on Amazonian fish. Journal of Applied Ecology, 55(3), 1312-1326.	Dryad	2018 Leal_et_al Capim	Fish	Fish	Pasture	Tropical	Brazil	Tropical & Subtropical Moist Broadleaf Forests	-3.09833	-47.3793	All the sites had less than 55% of forest cover in the watershed. Riparian as filtered as local cover only. Buffer>70% forest cover. NoBuffer<20% forest cover.	1	1	0	0	0	0
2018 Leal et al	Leal, C. G., Barlow, J., Gardner, T. A., Hughes, R. M., Leitão, R. P., Mac Nally, R., ... & Pompeu, P. S. (2018). Is environmental legislation conserving tropical stream faunas? A large‐scale assessment of local, riparian and catchment‐scale influences on Amazonian fish. Journal of Applied Ecology, 55(3), 1312-1326.	Dryad	2018 Leal_et_al Curu-Una	Fish	Fish	Pasture	Tropical	Brazil	Tropical & Subtropical Moist Broadleaf Forests	-3.173	-54.575	All the sites had less than 55% of forest cover in the watershed. Riparian as filtered as local cover only. Buffer>70% forest cover. NoBuffer<20% forest cover.	1	1	0	0	0	0
2018 Maure et al	Maure, L. A., Rodrigues, R. C., Alcântara, Â. V., Adorno, B. F., Santos, D. L., Abreu, E. L., ... & Hasui, E. (2018). Functional Redundancy in bird community decreases with riparian forest width reduction. Ecology and Evolution, 8(21), 10395-10408.	Dryad	2018 Maure et al	Birds	Bird	Agriculture	Tropical	Brazil	Tropical & Subtropical Moist Broadleaf Forests	-21.3897	-46.2678	Riparian buffer category: NoBuffer=patch<20ha; Buffer=patch>50ha&width>100m. Intermediate had no category.	1	1	0	0	0	0
2018 Valente-Neto et al	Valente-Neto, F., Rodrigues, M. E., & de Oliveira Roque, F. (2018). Selecting indicators based on biodiversity surrogacy and environmental response in a riverine network: Bringing operationality to biomonitoring. Ecological indicators, 94, 198-206.	Email	2018 Valente-Neto et al	Macroinvertebrates	Aquatic Invertebrates	Agriculture	Tropical	Brazil	Transition - Tropical & Subtropical Grasslands, Savannas & Shrublands	-20.6	-56.6	Forest transition. NoBuffer = 0 Veg Cover in 200m buffer; Buffer = 66% Forest cover in 200m Buffer; All the rest was removed. LatLong get from paper map	1	1	0	0	0	0
2018 Wilkinson et al	Wilkinson, C. L., Yeo, D. C., Tan, H. H., Fikri, A. H., & Ewers, R. M. (2018). Land-use change is associated with a significant loss of freshwater fish species and functional richness in Sabah, Malaysia. Biological Conservation, 222, 164-171.	Paper	2018 Wilkinson et al	Fish	Fish	Cropland	Tropical	Malaysia	Tropical & Subtropical Moist Broadleaf Forests	4.6	117.5	Removed logged watersheds without riparian data. Comparisons was done between Oil palm with and without riparian buffer and with reference watersheds.	1	1	1	0	0	0
2018 Zhang et al	Zhang, Y., Cheng, L., Tolonen, K. E., Yin, H., Gao, J., Zhang, Z., ... & Cai, Y. (2018). Substrate degradation and nutrient enrichment structuring macroinvertebrate assemblages in agriculturally dominated Lake Chaohu Basins, China. Science of the total environment, 627, 57-66.	Email	2018 Zhang et al	Aquatic Invertebrates	Aquatic Invertebrates	Cropland	Temperate	China	Temperate Broadleaf & Mixed Forests	31.3157	117.049	Filtered as: Buffer=Rip>15. NoBuffer=Rip<11. All channel morphology>10, avoiding direct large channelization effect. Transp and ship all > 10, avoiding this confounding effect. Also, removed sites in urban context, as there is no riparian contrast for this land use. Also, removed sites that were big channels used for transport	1	1	0	0	0	0
2019 Hansen et al	Hansen, B. D., Fraser, H. S., & Jones, C. S. (2019). Livestock grazing effects on riparian bird breeding behaviour in agricultural landscapes. Agriculture, ecosystems & environment, 270, 93-102.	Email	2019 Hansen et al	Bird	Bird	Pasture	Temperate	Australia	Temperate Broadleaf & Mixed Forests	-36.6809	145.433	Removed moderate grazzing from the contrast analysis. Classified buffers according to grazing intensity in the buffer zone.	1	1	0	0	1	0
2019 Turunem et al	Turunen, J., Markkula, J., Rajakallio, M., & Aroviita, J. (2019). Riparian forests mitigate harmful ecological effects of agricultural diffuse pollution in medium-sized streams. Science of the Total Environment, 649, 495-503.	Email	2019 Turunen et al	Aquatic Invertebrates	Aquatic Invertebrates	Cropland	Temperate	Finland	Boreal Forests/Taiga	63.6686	23.7052		1	1	0	0	0	0
2020 Casatti et al	Casatti, L., Brejão, G. L., Carvalho, F. R., Silva, H. P. D., Pérez-Mayorga, M. A., Manzotti, A. R., ... & Langeani, F. (2020). Stream fish from recently deforested basins in the Meridional Amazon, Mato Grosso, Brazil. Biota Neotropica, 20, e20190744.	Email	2020 Casatti et al	Fish	Fish	Pasture	Tropical	Brazil	Tropical & Subtropical Moist Broadleaf Forests	-10.7341	-58.8636	Reference = Forest catchments and forest buffer (>50% forest cover). NoBuffer = >50% Pasture catchment and <10% Forest cover in the margins and <5% trees in the margins. Buffer = >50% Pasture catchment >50% Woody riparian cover and >28 tree cover in the buffer.	1	1	1	0	0	0
2020 Czegledi et al	Czeglédi, I., Kern, B., Tóth, R., Seress, G., & Erős, T. (2020). Impacts of urbanization on stream fish assemblages: the role of the species pool and the local environment. Frontiers in Ecology and Evolution, 8, 137.	Email	2020 Czegledi et al	Fish	Fish	Urban	Temperate	Hungary	Temperate Broadleaf & Mixed Forests	47.268	18.59	Filtered original data: Classified and filtered sites according to bank vegetation and ID. *Tree cover >= 60% in reference ID were Forest Buffer. *Herbacious cover >=90% in reference ID were Grassy Buffer. *Concrete cover >=95% in urban ID were concrete Buffer. Later, sampled the number of grassy sites to have the same number of forest sites	1	1	0	0	0	0
2020 Melo et al	Melo, A. L. U., Ono, E. R., & Uieda, V. S. (2020). Benthic invertebrate communities structure in headwater streams with different states of the riparian vegetation conservation. Community Ecology, 21, 43-53.	Email	2020 Melo et al	Aquatic Invertebrates	Aquatic Invertebrates	Agriculture	Tropical	Brazil	Transition - Tropical & Subtropical Grasslands, Savannas & Shrublands	-23.1563	-48.8518	Filtered. Removed intermediate buffer condition sites.	1	1	0	0	0	0
2021 Gheoca et al	Gheoca, V., Benedek, A. M., & Schneider, E. (2021). Exploring land snails’ response to habitat characteristics and their potential as bioindicators of riparian forest quality. Ecological Indicators, 132, 108289.	Paper	2021 Gheoca et al	Land snails	Terrestrial invertebrates	Agriculture	Temperate	Romania	Temperate Broadleaf & Mixed Forests, Temperate Coniferous Forest	46.0333	24.627	Landscapes are pasture, agriculture and residential. *Buffers are sites with more than 15 m width summing both sides and QBR < 85. *No Buffer are sites with less than 9 m width summing both sides and QBR < 60	1	1	0	0	0	0
2021 Marques et al	Marques, N. C., Jankowski, K. J., Macedo, M. N., Juen, L., Luiza-Andrade, A., & Deegan, L. A. (2021). Riparian forests buffer the negative effects of cropland on macroinvertebrate diversity in lowland Amazonian streams. Hydrobiologia, 848(15), 3503-3520.	Paper	2021 Marques et al	EPT	Aquatic Invertebrates	Cropland	Tropical	Brazil	Tropical & Subtropical Moist Broadleaf Forests	-12.8885	-52.382		1	1	1	0	0	0
2021 Martins et al	Martins, R. T., Brito, J., Dias-Silva, K., Leal, C. G., Leitao, R. P., Oliveira, V. C., ... & Hughes, R. M. (2021). Low forest-loss thresholds threaten Amazonian fish and macroinvertebrate assemblage integrity. Ecological Indicators, 127, 107773.	Email	2021 Martins et al Paragominas	Macroinvertebrates	Aquatic Invertebrates	Agriculture	Tropical	Brazil	Tropical & Subtropical Moist Broadleaf Forests	-3.16019	-47.4427	Original classification, as provided by author	1	1	1	0	0	0
2021 Martins et al	Martins, R. T., Brito, J., Dias-Silva, K., Leal, C. G., Leitao, R. P., Oliveira, V. C., ... & Hughes, R. M. (2021). Low forest-loss thresholds threaten Amazonian fish and macroinvertebrate assemblage integrity. Ecological Indicators, 127, 107773.	Email	2021 Martins et al Santarem	Macroinvertebrates	Aquatic Invertebrates	Agriculture	Tropical	Brazil	Tropical & Subtropical Moist Broadleaf Forests	-2.96953	-54.724	Original classification, as provided by author	1	1	1	0	0	0
2021 Monteles et al	Monteles, J. S., Gerhard, P., Ferreira, A., & Sonoda, K. C. (2021). Agriculture impacts benthic insects on multiple scales in the Eastern Amazon. Biological Conservation, 255, 108998.	Paper	2021 Monteles et al	EPT	Aquatic Invertebrates	Agriculture	Tropical	Brazil	Tropical & Subtropical Moist Broadleaf Forests	-1.44767	-47.5332	Reference = watersheds with forest landuse (>85%). All the other with less that 21% forest in the watershed. Removed DIVIDA site, so that all treatments have same number of sites	1	1	1	0	0	0
2021 Turunem et al	Turunen, J., Elbrecht, V., Steinke, D., & Aroviita, J. (2021). Riparian forests can mitigate warming and ecological degradation of agricultural headwater streams. Freshwater Biology, 66(4), 785-798.	Dryad	2021 Turunen et al EPT	EPT	Aquatic Invertebrates	Agriculture	Temperate	Finland	Boreal Forests/Taiga	63.9341	24.3205	Removed 4 sites with sampling error for EPT only	1	1	0	0	0	0
2021 Turunem et al	Turunen, J., Elbrecht, V., Steinke, D., & Aroviita, J. (2021). Riparian forests can mitigate warming and ecological degradation of agricultural headwater streams. Freshwater Biology, 66(4), 785-798.	Dryad	2021 Turunen et al FISH	Fish	Fish	Agriculture	Temperate	Finland	Boreal Forests/Taiga	63.929	24.3643	Paired design, use watershed as control in the analysis	1	1	0	0	0	0
2022 Deere et al	Deere, N. J., Bicknell, J. E., Mitchell, S. L., Afendy, A., Baking, E. L., Bernard, H., ... & Struebig, M. J. (2022). Riparian buffers can help mitigate biodiversity declines in oil palm agriculture. Frontiers in Ecology and the Environment, 20(8), 459-466.	Zenodo	2022 Deere et al Aquatic Invertebrates Cropland	Macroinvertebrates	Aquatic Invertebrates	Cropland	Tropical	Malaysia	Tropical & Subtropical Moist Broadleaf Forests	4.64029	117.541	Same stream repeated samples were summed as a single replication for species abundances and averaged for riparian width and coordinates. Removed HDF treatment (catchments with heavely disturbed forest) as it does not meet our criteria	0	0	1	0	0	0
2022 Deere et al	Deere, N. J., Bicknell, J. E., Mitchell, S. L., Afendy, A., Baking, E. L., Bernard, H., ... & Struebig, M. J. (2022). Riparian buffers can help mitigate biodiversity declines in oil palm agriculture. Frontiers in Ecology and the Environment, 20(8), 459-466.	Zenodo	2022 Deere et al Bird Cropland	Birds	Bird	Cropland	Tropical	Malaysia	Tropical & Subtropical Moist Broadleaf Forests	4.64187	117.543	Same stream repeated samples were summed as a single replication for species abundances and averaged for riparian width and coordinates. Removed HDF treatment (catchments with heavely disturbed forest) as it does not meet our criteria	0	0	1	1	1	1
2022 Deere et al	Deere, N. J., Bicknell, J. E., Mitchell, S. L., Afendy, A., Baking, E. L., Bernard, H., ... & Struebig, M. J. (2022). Riparian buffers can help mitigate biodiversity declines in oil palm agriculture. Frontiers in Ecology and the Environment, 20(8), 459-466.	Zenodo	2022 Deere et al Fish Cropland	Fish	Fish	Cropland	Tropical	Malaysia	Tropical & Subtropical Moist Broadleaf Forests	4.65746	117.516	Same stream repeated samples were summed as a single replication for species abundances and averaged for riparian width and coordinates. Removed HDF treatment (catchments with heavely disturbed forest) as it does not meet our criteria	0	0	1	0	0	0
2022 Deere et al	Deere, N. J., Bicknell, J. E., Mitchell, S. L., Afendy, A., Baking, E. L., Bernard, H., ... & Struebig, M. J. (2022). Riparian buffers can help mitigate biodiversity declines in oil palm agriculture. Frontiers in Ecology and the Environment, 20(8), 459-466.	Zenodo	2022 Deere et al FROGS	Amphibians	Amphibian	Cropland	Tropical	Malaysia	Tropical & Subtropical Moist Broadleaf Forests	4.63537	117.549	Same stream repeated samples were summed as a single replication for species abundances and averaged for riparian width and coordinates. Removed HDF treatment (catchments with heavely disturbed forest) as it does not meet our criteria	1	1	1	0	1	0
2022 Deere et al	Deere, N. J., Bicknell, J. E., Mitchell, S. L., Afendy, A., Baking, E. L., Bernard, H., ... & Struebig, M. J. (2022). Riparian buffers can help mitigate biodiversity declines in oil palm agriculture. Frontiers in Ecology and the Environment, 20(8), 459-466.	Zenodo	2022 Deere et al Large mammal Cropland	Large mammals	Large mammal	Cropland	Tropical	Malaysia	Tropical & Subtropical Moist Broadleaf Forests	4.64187	117.543	Same stream repeated samples were summed as a single replication for species abundances and averaged for riparian width and coordinates. Removed HDF treatment (catchments with heavely disturbed forest) as it does not meet our criteria	0	0	1	0	0	0
2022 Deere et al	Deere, N. J., Bicknell, J. E., Mitchell, S. L., Afendy, A., Baking, E. L., Bernard, H., ... & Struebig, M. J. (2022). Riparian buffers can help mitigate biodiversity declines in oil palm agriculture. Frontiers in Ecology and the Environment, 20(8), 459-466.	Zenodo	2022 Deere et al SMALL MAMMALS	Small mammals	Small mammal	Cropland	Tropical	Malaysia	Tropical & Subtropical Moist Broadleaf Forests	4.61683	117.581	Same stream repeated samples were summed as a single replication for species abundances and averaged for riparian width and coordinates. Removed HDF treatment (catchments with heavely disturbed forest) as it does not meet our criteria	1	1	1	0	0	0
2022 Oropeza-Sanchez	Oropeza-Sánchez, M. T., Suazo-Ortuño, I., Benítez-Malvido, J., Monroy-Hernández, E., & Munguía-Steyer, R. (2022). Amphibian richness along modified riparian areas of central Mexico: conservation priorities. Ecological Processes, 11(1), 63.	Email	2022 Oropeza-Sanches	Amphibians	Amphibian	Agriculture	Tropical	Mexico	Tropical & Subtropical Coniferous Forests	19.4917	-100.879	Reference = > 80% forest buffer and forest watershed. Buffer = >60% forest buffer and agriculture context. NoBuffer =<40%forest in the 500m area, no buffer in the googleEarth and agriculture context. All the sites were checked again in google earth.	1	1	1	0	0	0
2023 Rojas-Castillo et al	Rojas-Castillo, O. A., Kepfer-Rojas, S., Vargas, N., & Jacobsen, D. (2023). Forest buffer-strips mitigate the negative impact of oil palm plantations on stream communities. Science of The Total Environment, 873, 162259.	Paper	2023 Rojas-Castillo et al Cropland	Macroinvertebrates	Aquatic Invertebrates	Cropland	Tropical	Guatemala	Tropical & Subtropical Moist Broadleaf Forests	15.9685	-90.6673	Kept three sampling sites in each treatment to have comparable sample sizes between treatments. Removed pasture treatment as there is no riparian contrast for this land use type.	1	1	1	0	0	0
2024 Cantanhede & Montag	Cantanhêde, L. G., & de Assis Montag, L. F. (2024). Effects of deforestation on environmental heterogeneity and its role in the distribution of fish species and functional groups in Amazonian streams. Hydrobiologia, 851(2), 327-341.	Email	2024 Cantanhade and Montag	Fish	Fish	Agriculture	Tropical	Brazil	Tropical & Subtropical Moist Broadleaf Forests	-2.5822	-48.4817	For reference, randomly selected fully covered sites with forest in the catchment and riparian buffer. Buffer and NoBuffer had more than 50% agricultural landuse in the catchment. NoBuffer had no forest in the 30m buffer around stream, while buffer had more than 70%.	1	1	1	0	0	0

## Sheet: Column description
Table S2. Description for columns of the previous table.
Column names	Description
Study	Study abbrevation - included in the meta-analysis
Reference	Complete study reference
Dataset_source	How the data was obtained
Dataset_code	Dataset code for each study, combining different taxa, land use, and any other sub-group within study
Taxa_minor	Taxa assessed in the study - higher classification
Taxa_summarized	Taxa coarser classification as used in the meta-analysis
Land_use_summarized	Landscape context as the predominant land use in the landscape or in the upland area away from riparian zone.
Overall_Region	Temperate or Tropical region - all forest
Country	Contry where the study was conducted
Biome	Biome where the sudy was conducted, based on terrestrial ecoregions of the world
Latitude_mean	Mean latitude of studied sites considering all sampling sites for each study
Longitude_mean	Mean longitude of studied sites considering all sampling sites for each study
Obs.	Descripton of any filtering made on the original study data in order to be able to include in the analysis according to the questions investigated
Q1a.BufferVSNoBuffer_Div	0 or 1 to whether the study was included or not for a given analysis. Question 1 comparing species diversity between buffer and no buffer riparian areas imersed in human-altered landscapes.
Q1b.BufferVSNoBuffer_Comp	0 or 1 to whether the study was included or not for a given analysis. Question 1 comparing species composition between buffer and no buffer riparian areas imersed in human-altered landscapes.
Q2.ReferenceVSBuffer_NoBuffer	0 or 1 to whether the study was included or not for a given analysis. Question 2 comparing the proportion of reference species found in buffer vs. no buffer riparian areas imersed in human-altered landscapes. Reference species are those occurring in riparian areas with continuous forests.
Q3a.Buffer_size_Ref	0 or 1 to whether the study was included or not for a given analysis. Question 3 assessing the proportion of reference species found in for each buffer size.
Q3b.Buffer_size_For	0 or 1 to whether the study was included or not for a given analysis. Question 3 assessing the number of forest obligate species found in for each buffer size.
Q3c.Buffer_size_Rip	0 or 1 to whether the study was included or not for a given analysis. Question 3 assessing the number of riparian specialist species in each buffer size.

## Sheet: Studies excluded later
Table S2. Studies removed later for different reasons. See Obs.2 for reasons.
Study	Repeated?	Reference	Dataset_code	Taxa_minor	Taxa_summarized	Land_use_summarized	Overall_Region	Country	Biome	Latitude_mean	Longitude_mean	Obs.	BufferVSNoBuffer_Div	BufferVSNoBuffer_Comp	ReferenceVSBuffer_NoBuffer	Buffer_size_Ref	Buffer_size_For	Buffer_size_Rip	Obs.2
2009 Baker et al	0	Baker, S., Barmuta, L., Grove, S., & Richardson, A. (2009). Are streamside buffers edge-affected habitat for ground-dwelling forest beetle assemblages?. Biodiversity and Conservation, 18, 3467-3482.	2009 Baker et al Terrestrial invertebrates Logging	Bettles	Terrestrial invertebrates	Logging	Temperate	Australia	Temperate Broadleaf & Mixed Forests	-43.23	146.7	Removed logging regeneration and continuous upland categories as they were not in the riparian zone. All sites have buffer, so reference vs buffer will be compared.	0	0	0	0	0	0	Poor model fit - removed later from buffer size analysis
2014 Olson et al	0	Olson, D. H., Leirness, J. B., Cunningham, P. G., & Steel, E. A. (2014). Riparian buffers and forest thinning: Effects on headwater vertebrates 10 years after thinning. Forest Ecology and Management, 321, 81-93.	2014 Olso et al Amphibian Logging	Amphibians	Amphibian	Logging	Temperate	US	Temperate Coniferous Forest	44.2512	-123.249		0	0	0	0	0	0	Poor model fit - removed later from buffer size analysis
2017 Garcia-Martinez et al	0	García-Martínez, M. Á., Valenzuela-González, J. E., Escobar-Sarria, F., López-Barrera, F., & Castaño-Meneses, G. (2017). The surrounding landscape influences the diversity of leaf-litter ants in riparian cloud forest remnants. PloS one, 12(2), e0172464.	2017 Garcia-Martinez et al Terrestrial invertebrates Agriculture	Ants	Terrestrial invertebrates	Agriculture	Tropical	Mexico	Tropical & Subtropical Moist Broadleaf Forests	19.455	-97.039	Compare reference vs agriculture context only, and buffer size as well	0	0	0	0	0	0	Poor model fit - removed later from buffer size analysis
2020 Mullin et al	0	Mullin, K. E., Yoh, N., Mitchell, S. L., Basrur, S., Seaman, D. J., Bernard, H., & Struebig, M. J. (2020). Riparian reserves promote insectivorous bat activity in oil palm dominated landscapes. Frontiers in Forests and Global Change, 3, 73.	2020 Mullin et al Small mammal Cropland	Bats	Small mammal	Cropland	Tropical	Malaysia	Tropical & Subtropical Moist Broadleaf Forests	4.63	117.55	Reference = Forest watershed, either intact or previous logged. Buffer OilPalm = Forest riparian buffer in Oil Palm matrix. NoBuffer_OilPalm = OilPalm watersheds with No Forest Buffers	0	0	0	0	0	0	Poor model fit - removed later from buffer size analysis
2022 Deere et al	Repeated	Deere, N. J., Bicknell, J. E., Mitchell, S. L., Afendy, A., Baking, E. L., Bernard, H., ... & Struebig, M. J. (2022). Riparian buffers can help mitigate biodiversity declines in oil palm agriculture. Frontiers in Ecology and the Environment, 20(8), 459-466.	2022 Deere et al Terrestrial invertebrates Cropland	Dung beetles	Terrestrial invertebrates	Cropland	Tropical	Malaysia	Tropical & Subtropical Moist Broadleaf Forests	4.6375	117.542	Same stream repeated samples were summed as a single replication for species abundances and averaged for riparian width and coordinates. Removed HDF treatment (catchments with heavely disturbed forest) as it does not meet our criteria	0	0	0	0	0	0	NOT USED - REMOVED FOR REPEATED DATA ON 2014 GRAY ET AL
2023 Rojas-Castillo et al	Repeated	Rojas-Castillo, O. A., Kepfer-Rojas, S., Vargas, N., & Jacobsen, D. (2023). Forest buffer-strips mitigate the negative impact of oil palm plantations on stream communities. Science of The Total Environment, 873, 162259.	2023 Rojas-Castillo et al Pasture	Macroinvertebrates	Aquatic Invertebrates	Pasture	Tropical	Guatemala	Tropical & Subtropical Moist Broadleaf Forests	15.9633	-90.6587	Kept three sampling sites in each treatment to have comparable sample sizes between treatments. Removed pasture treatment as there is no riparian contrast for this land use type.	0	0	0	0	0	0	NOT USED - NO CONTRAST FOR PASTURE
