# Supplementary material for: Assessing the effectiveness of riparian buffers in protecting biodiversity
Source: Research Square preprint supplement (doi:10.21203/rs.3.rs-6353341/v1), 2025-05-26
Supplement: Supplementary file 2 [file 85700a62f4502d206c7efe0e.docx]

**Table S3.** All species alpha diversity effect sizes (Hedges’ gα) comparing buffer (FRB) vs. no-buffer (CRB) riparian zones, with their lower (2.5%) and upper (97.5%) coefficients of intervals (CI), with the respective number of studies (N.Stu) and number of datasets - or different combinations of taxa and land use within studies (N.Dat), for each level within model predictors.

| **Model** | **Levels** | **gα** | **CI.lo** | **CI.up** | **N.Stu** | **N.Dat** |
| --- | --- | --- | --- | --- | --- | --- |
| All | All | 0.442 | 0.237 | 0.647 | 60 | 67 |
| Region | Temperate | 0.415 | 0.164 | 0.667 | 36 | 39 |
|  | Tropical | 0.484 | 0.126 | 0.841 | 24 | 28 |
| Land use | Urban | 0.567 | -0.737 | 1.872 | 3 | 3 |
|  | Silviculture | 0.417 | -0.35 | 1.185 | 5 | 5 |
|  | Logging | 0.338 | -0.17 | 0.846 | 12 | 12 |
|  | Pasture | 0.239 | -0.413 | 0.892 | 9 | 10 |
|  | Cropland | 0.744 | 0.224 | 1.264 | 10 | 11 |
|  | Mixed | 0.436 | 0.141 | 0.73 | 23 | 26 |
| Taxa | Aqua. Invert. | 0.414 | 0.157 | 0.671 | 23 | 26 |
|  | Terr. Invert. | 0.725 | -0.117 | 1.567 | 9 | 9 |
|  | Fish | 0.08 | -0.259 | 0.42 | 17 | 18 |
|  | Amphibians | 0.874 | 0.102 | 1.647 | 6 | 6 |
|  | Mammals | 0.584 | -0.418 | 1.586 | 3 | 3 |
|  | Birds | 0.789 | 0.174 | 1.404 | 4 | 5 |

**Table S4.** All species gamma diversity effect sizes (Log Response Ratio-LRR, converted to percentage difference-Per) comparing buffer (FRB) vs. no-buffer (CRB) riparian zones, with their lower (2.5%) and upper (97.5%) coefficients of intervals (CI), with the respective number of studies (N.Stu) and number of datasets - or different combinations of taxa and land use within studies (N.Dat), for each level within model predictors.

| **Model** | **Levels** | **LRRg** | **CI.lo** | **CI.up** | **N.Stu** | **N.Dat** | **Perc** | **Perc.CIlo** | **Perc.CIup** |
| --- | --- | --- | --- | --- | --- | --- | --- | --- | --- |
| All | All | 0.171 | 0.095 | 0.246 | 60 | 67 | 18.65 | 9.97 | 27.89 |
| Region | Temperate | 0.101 | 0.005 | 0.193 | 36 | 39 | 10.63 | 0.50 | 21.29 |
|  | Tropical | 0.274 | 0.158 | 0.385 | 24 | 28 | 31.52 | 17.12 | 46.96 |
| Land use | Urban | 0.266 | -0.056 | 0.567 | 3 | 3 | 30.47 | -5.45 | 76.30 |
|  | Silviculture | 0.084 | -0.182 | 0.339 | 5 | 5 | 8.76 | -16.64 | 40.35 |
|  | Logging | 0.093 | -0.077 | 0.264 | 12 | 12 | 9.75 | -7.41 | 30.21 |
|  | Pasture | 0.050 | -0.144 | 0.239 | 9 | 10 | 5.13 | -13.41 | 27.00 |
|  | Cropland | 0.442 | 0.273 | 0.608 | 10 | 11 | 55.58 | 31.39 | 83.68 |
|  | Mixed | 0.148 | 0.038 | 0.262 | 23 | 26 | 15.95 | 3.87 | 29.95 |
| Taxa | Aqua. Invert. | 0.122 | 0.007 | 0.232 | 23 | 26 | 12.98 | 0.70 | 26.11 |
|  | Terr. Invert. | 0.290 | 0.087 | 0.483 | 9 | 9 | 33.64 | 9.09 | 62.09 |
|  | Fish | 0.023 | -0.105 | 0.155 | 17 | 18 | 2.33 | -9.97 | 16.77 |
|  | Amphibians | 0.463 | 0.237 | 0.685 | 6 | 6 | 58.88 | 26.74 | 98.38 |
|  | Mammals | 0.426 | 0.104 | 0.747 | 3 | 3 | 53.11 | 10.96 | 111.07 |
|  | Birds | 0.243 | -0.021 | 0.505 | 4 | 5 | 27.51 | -2.08 | 65.70 |

**Table S5.** All species Whittaker’s β diversity effect sizes (Log Response Ratio-LRR, converted to percentage difference-Per) comparing buffer vs. no-buffer riparian zones, with their lower and upper coefficients of intervals (CI), the respective number of studies (N_Stu), and number of datasets – or different combinations of taxa and land use within studies (N_Dat), for each level within model predictors. All model CIs overlay zero.

| **Model** | **Levels** | **LRRg** | **CI.lo** | **CI.up** | **N.Stu** | **N.Dat** | **Perc** | **Perc.CIlo** | **Perc.CIup** |
| --- | --- | --- | --- | --- | --- | --- | --- | --- | --- |
| All | All | -0.023 | -0.069 | 0.022 | 60 | 66 | -2.27 | -6.67 | 2.22 |
| Region | Temperate | -0.051 | -0.114 | 0.011 | 36 | 38 | -4.97 | -10.77 | 1.11 |
|  | Tropical | 0.017 | -0.058 | 0.088 | 24 | 28 | 1.71 | -5.64 | 9.20 |
| Land use | Urban | -0.173 | -0.386 | 0.044 | 2 | 3 | -15.89 | -32.02 | 4.50 |
|  | Silviculture | -0.007 | -0.179 | 0.163 | 5 | 5 | -0.70 | -16.39 | 17.70 |
|  | Logging | -0.047 | -0.166 | 0.057 | 12 | 12 | -4.59 | -15.30 | 5.87 |
|  | Pasture | 0.000 | -0.123 | 0.120 | 9 | 10 | 0.00 | -11.57 | 12.75 |
|  | Cropland | 0.056 | -0.067 | 0.173 | 10 | 11 | 5.76 | -6.48 | 18.89 |
|  | Mixed | -0.038 | -0.110 | 0.038 | 23 | 25 | -3.73 | -10.42 | 3.87 |
| Taxa | Aqua. Invert. | -0.074 | -0.148 | 0.000 | 23 | 26 | -7.13 | -13.76 | 0.00 |
|  | Terr. Invert. | -0.063 | -0.189 | 0.057 | 9 | 9 | -6.11 | -17.22 | 5.87 |
|  | Fish | 0.027 | -0.057 | 0.119 | 16 | 17 | 2.74 | -5.54 | 12.64 |
|  | Amphibians | 0.015 | -0.142 | 0.169 | 6 | 6 | 1.51 | -13.24 | 18.41 |
|  | Mammals | 0.194 | -0.012 | 0.406 | 3 | 3 | 21.41 | -1.19 | 50.08 |
|  | Birds | -0.037 | -0.217 | 0.132 | 4 | 5 | -3.63 | -19.51 | 14.11 |

**Table S6.** All species Raup-Crick β diversity effect sizes (Log Response Ratio-LRR, converted to percentage difference-Per) comparing buffer vs. no-buffer riparian zones, with their lower and upper coefficients of intervals (CI), the respective number of studies (N_Stu), and number of datasets – or different combinations of taxa and land use within studies (N_Dat), for each level within model predictors.

| **Model** | **Levels** | **LRRg** | **CI.lo** | **CI.up** | **N.Stu** | **N.Dat** | **Perc** | **Perc.CIlo** | **Perc.CIup** |
| --- | --- | --- | --- | --- | --- | --- | --- | --- | --- |
| All | All | -0.041 | -0.122 | 0.036 | 60 | 67 | -4.02 | -11.49 | 3.67 |
| Region | Temperate | -0.035 | -0.143 | 0.064 | 36 | 39 | -3.44 | -13.32 | 6.61 |
|  | Tropical | -0.050 | -0.186 | 0.080 | 24 | 28 | -4.88 | -16.97 | 8.33 |
| Land use | Urban | -0.008 | -0.332 | 0.318 | 3 | 3 | -0.8 | -28.25 | 37.44 |
|  | Silviculture | 0.042 | -0.199 | 0.284 | 5 | 5 | 4.29 | -18.05 | 32.84 |
|  | Logging | -0.176 | -0.339 | -0.018 | 12 | 12 | -16.14 | -28.75 | -1.78 |
|  | Pasture | -0.070 | -0.264 | 0.143 | 9 | 10 | -6.76 | -23.20 | 15.37 |
|  | Cropland | -0.148 | -0.334 | 0.031 | 10 | 11 | -13.76 | -28.39 | 3.15 |
|  | Mixed | 0.059 | -0.062 | 0.173 | 23 | 26 | 6.08 | -6.01 | 18.89 |
| Taxa | Aqua. Invert. | -0.011 | -0.130 | 0.112 | 23 | 26 | -1.09 | -12.19 | 11.85 |
|  | Terr. Invert. | -0.051 | -0.241 | 0.156 | 9 | 9 | -4.97 | -21.42 | 16.88 |
|  | Fish | 0.041 | -0.098 | 0.172 | 17 | 18 | 4.19 | -9.34 | 18.77 |
|  | Amphibians | -0.115 | -0.343 | 0.112 | 6 | 6 | -10.86 | -29.04 | 11.85 |
|  | Mammals | -0.084 | -0.382 | 0.234 | 3 | 3 | -8.06 | -31.75 | 26.36 |
|  | Birds | -0.390 | -0.696 | -0.105 | 4 | 5 | -32.29 | -50.14 | -9.97 |

**Table S7.** Reference species subset alpha diversity effect sizes (Hedges’ gα) comparing buffer (FRB) vs. no-buffer (CRB) riparian zones, with their lower (2.5%) and upper (97.5%) coefficients of intervals (CI), with the respective number of studies (N.Stu) and number of datasets - or different combinations of taxa and land use within studies (N.Dat), for each level within model predictors.

| **Model** | **Levels** | **gα** | **CI.lo** | **CI.up** | **N.Stu** | **N.Dat** |
| --- | --- | --- | --- | --- | --- | --- |
| All | All | 0.697 | 0.355 | 1.04 | 34 | 42 |
| Region | Temperate | 0.723 | 0.321 | 1.125 | 21 | 23 |
|  | Tropical | 0.659 | 0.018 | 1.3 | 13 | 19 |
| Land use | Urban | 1.256 | 0.767 | 1.746 | 2 | 2 |
|  | Silviculture | 0.321 | -0.838 | 1.48 | 4 | 4 |
|  | Logging | 0.656 | 0.201 | 1.11 | 13 | 13 |
|  | Pasture | 1.008 | -0.301 | 2.317 | 5 | 5 |
|  | Cropland | 1.119 | 0.289 | 1.949 | 7 | 12 |
|  | Mixed | 0.11 | -0.939 | 1.16 | 5 | 6 |
| Taxa | Aqua. Invert. | 0.653 | 0.042 | 1.265 | 13 | 15 |
|  | Terr. Invert. | 1.156 | 0.034 | 2.278 | 6 | 6 |
|  | Fish | 0.014 | -0.498 | 0.526 | 7 | 7 |
|  | Amphibians | 0.816 | -0.124 | 1.756 | 5 | 5 |
|  | Mammals | 0.809 | 0.268 | 1.351 | 4 | 5 |
|  | Birds | 1.261 | 0.286 | 2.236 | 3 | 4 |

**Table S8.** Reference species subset gamma diversity effect sizes (Log Response Ratio-LRR, converted to percentage difference-Per) comparing buffer (FRB) vs. no-buffer (CRB) riparian zones, with their lower (2.5%) and upper (97.5%) coefficients of intervals (CI), with the respective number of studies (N.Stu) and number of datasets - or different combinations of taxa and land use within studies (N.Dat), for each level within model predictors.

| **Model** | **Levels** | **LRRg** | **CI.lo** | **CI.up** | **N.Stu** | **N.Dat** | **Perc** | **Perc.CIlo** | **Perc.CIup** |
| --- | --- | --- | --- | --- | --- | --- | --- | --- | --- |
| All | All | 0.278 | 0.166 | 0.388 | 34 | 42 | 32.05 | 18.06 | 47.40 |
| Region | Temperate | 0.205 | 0.068 | 0.343 | 21 | 23 | 22.75 | 7.04 | 40.92 |
|  | Tropical | 0.368 | 0.202 | 0.538 | 13 | 19 | 44.48 | 22.38 | 71.26 |
| Land use | Urban | 0.490 | 0.057 | 0.914 | 2 | 2 | 63.23 | 5.87 | 149.43 |
|  | Silviculture | 0.117 | -0.200 | 0.415 | 4 | 4 | 12.41 | -18.13 | 51.44 |
|  | Logging | 0.103 | -0.068 | 0.297 | 13 | 13 | 10.85 | -6.57 | 34.58 |
|  | Pasture | 0.303 | -0.015 | 0.597 | 5 | 5 | 35.39 | -1.49 | 81.67 |
|  | Cropland | 0.519 | 0.319 | 0.725 | 7 | 12 | 68.03 | 37.58 | 106.47 |
|  | Mixed | 0.221 | -0.039 | 0.484 | 5 | 6 | 24.73 | -3.82 | 62.26 |
| Taxa | Aqua. Invert. | 0.154 | -0.026 | 0.345 | 13 | 15 | 16.65 | -2.57 | 41.20 |
|  | Terr. Invert. | 0.429 | 0.148 | 0.706 | 6 | 6 | 53.57 | 15.95 | 102.59 |
|  | Fish | 0.030 | -0.216 | 0.282 | 7 | 7 | 3.05 | -19.43 | 32.58 |
|  | Amphibians | 0.343 | 0.046 | 0.650 | 5 | 5 | 40.92 | 4.71 | 91.55 |
|  | Mammals | 0.268 | -0.018 | 0.562 | 4 | 5 | 30.73 | -1.78 | 75.42 |
|  | Birds | 0.764 | 0.424 | 1.098 | 3 | 4 | 114.68 | 52.81 | 199.82 |

**Table S9.** Reference species subset Whittaker’s β diversity effect sizes (Log Response Ratio-LRR, converted to percentage difference-Per) comparing buffer vs. no-buffer riparian zones, with their lower and upper coefficients of intervals (CI), the respective number of studies (N.Stu), and number of datasets – or different combinations of taxa and land use within studies (N.Dat), for each level within model predictors. All model CIs overlay zero.

| **Model** | **Levels** | **LRRg** | **CI.lo** | **CI.up** | **N.Stu** | **N.Dat** | **Perc** | **Perc.CIlo** | **Perc.CIup** |
| --- | --- | --- | --- | --- | --- | --- | --- | --- | --- |
| All | All | -0.038 | -0.117 | 0.040 | 34 | 42 | -3.73 | -11.04 | 4.08 |
| Region | Temperate | -0.085 | -0.186 | 0.017 | 21 | 23 | -8.15 | -16.97 | 1.71 |
|  | Tropical | 0.035 | -0.087 | 0.159 | 13 | 19 | 3.56 | -8.33 | 17.23 |
| Land use | Urban | -0.380 | -0.671 | -0.064 | 2 | 2 | -31.61 | -48.88 | -6.20 |
|  | Silviculture | 0.052 | -0.154 | 0.274 | 4 | 4 | 5.34 | -14.27 | 31.52 |
|  | Logging | -0.098 | -0.218 | 0.023 | 13 | 13 | -9.34 | -19.59 | 2.33 |
|  | Pasture | -0.011 | -0.192 | 0.163 | 5 | 5 | -1.09 | -17.47 | 17.70 |
|  | Cropland | -0.046 | -0.202 | 0.124 | 7 | 12 | -4.50 | -18.29 | 13.20 |
|  | Mixed | 0.165 | -0.021 | 0.350 | 5 | 6 | 17.94 | -2.08 | 41.91 |
| Taxa | Aqua. Invert. | -0.038 | -0.167 | 0.090 | 13 | 15 | -3.73 | -15.38 | 9.42 |
|  | Terr. Invert. | -0.064 | -0.267 | 0.111 | 6 | 6 | -6.20 | -23.43 | 11.74 |
|  | Fish | -0.032 | -0.206 | 0.135 | 7 | 7 | -3.15 | -18.62 | 14.45 |
|  | Amphibians | -0.067 | -0.275 | 0.116 | 5 | 5 | -6.48 | -24.04 | 12.30 |
|  | Mammals | 0.039 | -0.166 | 0.233 | 4 | 5 | 3.98 | -15.30 | 26.24 |
|  | Birds | -0.053 | -0.296 | 0.198 | 3 | 4 | -5.16 | -25.62 | 21.90 |

**Table S10.** Reference species subset Raup-Crick β diversity effect sizes (Log Response Ratio-LRR, converted to percentage difference-Per) comparing buffer vs. no-buffer riparian zones, with their lower and upper coefficients of intervals (CI), the respective number of studies (N.Stu), and number of datasets – or different combinations of taxa and land use within studies (N.Dat), for each level within model predictors.

| **Model** | **Levels** | **LRRg** | **CI.lo** | **CI.up** | **N.Stu** | **N.Dat** | **Perc** | **Perc.CIlo** | **Perc.CIup** |
| --- | --- | --- | --- | --- | --- | --- | --- | --- | --- |
| All | All | -0.038 | -0.117 | 0.040 | 34 | 42 | -3.73 | -11.04 | 4.08 |
| Region | Temperate | -0.085 | -0.186 | 0.017 | 21 | 23 | -8.15 | -16.97 | 1.71 |
|  | Tropical | 0.035 | -0.087 | 0.159 | 13 | 19 | 3.56 | -8.33 | 17.23 |
| Land use | Urban | -0.380 | -0.671 | -0.064 | 2 | 2 | -31.61 | -48.88 | -6.20 |
|  | Silviculture | 0.052 | -0.154 | 0.274 | 4 | 4 | 5.34 | -14.27 | 31.52 |
|  | Logging | -0.098 | -0.218 | 0.023 | 13 | 13 | -9.34 | -19.59 | 2.33 |
|  | Pasture | -0.011 | -0.192 | 0.163 | 5 | 5 | -1.09 | -17.47 | 17.70 |
|  | Cropland | -0.046 | -0.202 | 0.124 | 7 | 12 | -4.50 | -18.29 | 13.20 |
|  | Mixed | 0.165 | -0.021 | 0.350 | 5 | 6 | 17.94 | -2.08 | 41.91 |
| Taxa | Aqua. Invert. | -0.038 | -0.167 | 0.090 | 13 | 15 | -3.73 | -15.38 | 9.42 |
|  | Terr. Invert. | -0.064 | -0.267 | 0.111 | 6 | 6 | -6.20 | -23.43 | 11.74 |
|  | Fish | -0.032 | -0.206 | 0.135 | 7 | 7 | -3.15 | -18.62 | 14.45 |
|  | Amphibians | -0.067 | -0.275 | 0.116 | 5 | 5 | -6.48 | -24.04 | 12.30 |
|  | Mammals | 0.039 | -0.166 | 0.233 | 4 | 5 | 3.98 | -15.30 | 26.24 |
|  | Birds | -0.053 | -0.296 | 0.198 | 3 | 4 | -5.16 | -25.62 | 21.90 |

**Table S11.** Assemblage species composition dissimilarity comparing buffer (FRB) vs. no-buffer (CRZ) riparian zones (Diss_Est), with their lower and upper coefficients of intervals (CI) from model fit, the respective number of studies (N.Stu), and number of datasets - or different combinations of taxa and land use within studies (N_Dat), for each level within model predictors. Dissimilarity differences using PERMANOVA approach were tested with a null model, with their corresponding values of Pseudo-F, Z-score and Probability (P) for 999 permutations. See Fig. S3 for the distribution of permuted and observed Pseudo-Fs.

| **Model** | **Levels** | **Diss_Est** | **Diss_CI.lo** | **Diss_CI.up** | **N.Stu** | **N.Dat** | **Pseud.F** | **Z** | **P** |
| --- | --- | --- | --- | --- | --- | --- | --- | --- | --- |
| All | All | 0.522 | 0.479 | 0.565 | 59 | 65 | 2.47 | 16.2 | 0.001 |
| Region | Temperate | 0.473 | 0.419 | 0.528 | 35 | 38 | 2.04 | 9.0 | 0.001 |
|  | Tropical | 0.592 | 0.528 | 0.652 | 24 | 27 | 3.12 | 14.0 | 0.001 |
| Land use | Urban | 0.508 | 0.300 | 0.713 | 2 | 2 | 1.17 | 0.2 | 0.320 |
|  | Silviculture | 0.325 | 0.210 | 0.466 | 5 | 5 | 1.99 | 2.5 | 0.021 |
|  | Logging | 0.417 | 0.333 | 0.506 | 12 | 12 | 1.92 | 5.3 | 0.001 |
|  | Pasture | 0.511 | 0.412 | 0.608 | 9 | 10 | 2.14 | 5.7 | 0.001 |
|  | Cropland | 0.621 | 0.528 | 0.706 | 10 | 11 | 4.25 | 10.4 | 0.001 |
|  | Mixed | 0.572 | 0.511 | 0.632 | 23 | 25 | 2.45 | 11.4 | 0.001 |
| Taxa | Aqua. Invert. | 0.511 | 0.444 | 0.578 | 23 | 25 | 1.92 | 9.1 | 0.001 |
|  | Terr. Invert. | 0.515 | 0.404 | 0.624 | 9 | 9 | 5.12 | 13.7 | 0.001 |
|  | Fish | 0.545 | 0.465 | 0.623 | 17 | 18 | 1.73 | 3.3 | 0.005 |
|  | Amphibians | 0.479 | 0.333 | 0.629 | 5 | 5 | 2.37 | 3.0 | 0.009 |
|  | Mammals | 0.415 | 0.243 | 0.609 | 3 | 3 | 4.15 | 3.2 | 0.016 |
|  | Birds | 0.611 | 0.462 | 0.743 | 4 | 5 | 4.46 | 16.6 | 0.001 |

**Table S12.** All species comparison between buffer (FRB) and no buffer (CRB) riparian areas, and their multimodel inference statistics from univariate models fitted using meta-analysis or mixed effect models. Response = diversity metrics used to calculate effect sizes (see *Effect sizes calculation* in Methods); Model = explanatory variables in each model. For a given model, k = number of parameters; LL = log-likelihood; AICc = small-sample Akaike Information Criterion; wAICc = Akaike weight, which can be interpreted as the probability that the model is the best out of all candidate models; η + τ = sum of comparison- and study-level random effects variance; R2 pseudo = variance explained by each model relative to the intercept-only null model (All), or fixed effect R2 for the other mixed effect models fitted for LLR or Diss (community dissimilarity) effect sizes.

| **Response** | **Model** | **k** | **LL** | **AICc** | **ΔAICc** | **wAICc** | **η + τ** | **R2 pseudo_fixed** |
| --- | --- | --- | --- | --- | --- | --- | --- | --- |
| gα | Overall | 2 | -83.47 | 171.12 | 0.00 | 0.67 | 0.33 | 0.00 |
|  | Taxa | 7 | -79.61 | 175.11 | 3.99 | 0.09 | 0.25 | 23.78 |
|  | Land use | 7 | -82.13 | 180.17 | 9.05 | 0.01 | 0.29 | 12.62 |
|  | Region | 3 | -83.41 | 173.21 | 2.09 | 0.23 | 0.33 | 0.33 |
| LRRγ | Overall | 3 | -17.92 | 42.23 | 0.00 | 0.58 | 0.33 | 0.00 |
|  | Taxa | 8 | -16.73 | 51.95 | 9.72 | 0.00 | 0.25 | 20.35 |
|  | Land use | 8 | -17.92 | 54.32 | 12.10 | 0.00 | 0.29 | 17.27 |
|  | Region | 4 | -17.11 | 42.87 | 0.64 | 0.42 | 0.33 | 7.96 |
| LRRβw | Overall | 3 | 13.61 | -20.84 | 0.00 | 0.91 | 0.33 | 0.00 |
|  | Taxa | 8 | 9.26 | 0.00 | 20.84 | 0.00 | 0.25 | 11.30 |
|  | Land use | 8 | 7.51 | 3.51 | 24.35 | 0.00 | 0.29 | 6.13 |
|  | Region | 4 | 12.46 | -16.27 | 4.57 | 0.09 | 0.33 | 3.14 |
| LRRβrc | Overall | 3 | -15.57 | 37.52 | 0.00 | 0.94 | 0.33 | 0.00 |
|  | Taxa | 8 | -17.79 | 54.07 | 16.55 | 0.00 | 0.25 | 11.67 |
|  | Land use | 8 | -18.06 | 54.60 | 17.08 | 0.00 | 0.29 | 9.91 |
|  | Region | 4 | -17.13 | 42.90 | 5.38 | 0.06 | 0.33 | 0.06 |
| Diss | Overall | 3 | 21.87 | -37.35 | 5.64 | 0.03 | 7.67 | 0.00 |
|  | Taxa | 8 | 23.50 | -28.43 | 14.56 | 0.00 | 8.11 | 20.54 |
|  | Land use | 8 | 30.78 | -42.99 | 0.00 | 0.53 | 11.60 | 54.82 |
|  | Region | 4 | 25.62 | -42.57 | 0.42 | 0.43 | 8.83 | 37.52 |

**Table S13.** Reference species subset comparison between buffer (FRB) and no buffer (CRB) riparian areas, and their multimodel inference statistics from univariate models fitted using meta-analysis or mixed effect models. Response = diversity metrics used to calculate effect sizes (see *Effect sizes calculation* in Methods); Model = explanatory variables in each model. For a given model, k = number of parameters; LL = log-likelihood; AICc = small-sample Akaike Information Criterion; wAICc = Akaike weight, which can be interpreted as the probability that the model is the best out of all candidate models; η + τ = sum of comparison- and study-level random effects variance; R2 pseudo = variance explained by each model relative to the intercept-only null model (All), or fixed effect R2 for the other mixed effect models fitted for LLR.

| **Response** | **Model** | **k** | **LL** | **AICc** | **ΔAICc** | **wAICc** | **η + τ** | **R2 pseudo_fixed** |
| --- | --- | --- | --- | --- | --- | --- | --- | --- |
| gα | Overall | 2 | -57.8 | 119.8 | 0.0 | 0.7 | 0.6 | 0.0 |
|  | Taxa | 7 | -54.5 | 126.4 | 6.5 | 0.0 | 0.5 | 22.2 |
|  | Land use | 7 | -55.1 | 127.7 | 7.8 | 0.0 | 0.5 | 22.7 |
|  | Region | 3 | -57.7 | 122.1 | 2.3 | 0.2 | 0.6 | 0.1 |
| LRRγ | Overall | 3 | -18.5 | 43.7 | 0.0 | 0.8 | 0.6 | 0.0 |
|  | Taxa | 8 | -17.2 | 54.8 | 11.1 | 0.0 | 0.5 | 26.8 |
|  | Land use | 8 | -17.4 | 55.2 | 11.5 | 0.0 | 0.5 | 23.5 |
|  | Region | 4 | -18.7 | 46.6 | 2.9 | 0.2 | 0.6 | 5.5 |
| LRRβw | Overall | 3 | 2.1 | 2.5 | 0.0 | 0.9 | 0.6 | 0.0 |
|  | Taxa | 8 | -4.1 | 28.6 | 26.1 | 0.0 | 0.5 | 1.6 |
|  | Land use | 8 | 1.0 | 18.5 | 15.9 | 0.0 | 0.5 | 21.6 |
|  | Region | 4 | 1.6 | 6.0 | 3.5 | 0.2 | 0.6 | 6.5 |
| LRRβrc | Overall | 3 | -6.4 | 19.4 | 0.0 | 0.9 | 0.6 | 0.0 |
|  | Taxa | 8 | -10.9 | 42.2 | 22.8 | 0.0 | 0.5 | 3.7 |
|  | Land use | 8 | -6.6 | 33.7 | 14.4 | 0.0 | 0.5 | 28.5 |
|  | Region | 4 | -7.1 | 23.4 | 4.0 | 0.1 | 0.6 | 4.0 |

**Table S14.** Riparian forest buffer width estimated to protect different taxa using different studies (datasets) with their respective coefficient of interval (CI). Buffer values are 90% and 99% (Estim99 and Estim90) asymptote estimates based on non-linear models (Model) fitted for every dataset separately. Response variable in the models was the proportions of reference species (those found exclusively in continuous forest or reference sub-basin covered by native forest), the number of forest obligate species, or species highly dependent on riparian forests. *NA = values for Estim99 were not calculated given the disproportional large confidence interval; in such cases, 90% values were added to 99% missing values to calculate average values in the Table S10. Average values in the last row were calculated replacing the NA values in the 99% estimates by their corresponding 90% for consistency in the number of data.

| **Dataset** | **Taxa** | **Metric** | **Estim99** | **loCI99** | **upCI99** | **Estim90** | **loCI90** | **upCI90** | **Model** | **Region** | **Land use** |
| --- | --- | --- | --- | --- | --- | --- | --- | --- | --- | --- | --- |
| 2002 Vesely | Amphibians | Reference species | 57.2 | 21.1 | 141.5 | 30.2 | 11.0 | 77.0 | Logistic | Temperate | Logging |
| 2002 Vesely | Amphibians | Forest obligate | 46.9 | 13.0 | 133.9 | 24.7 | 6.8 | 74.3 | Logistic | Temperate | Logging |
| 2004 Quinn et al | Aqua. Inv. | Reference species | 10.7 | -7.3 | 28.6 | 5.0 | -5.1 | 15.2 | Logistic | Temperate | Logging |
| 2008 Lees & Peres | Birds | Reference species | 532.6 | 187.7 | 962.7 | 307.8 | 122.2 | 544.7 | Logistic | Tropical | Mixed |
| 2008 Lees & Peres | Birds | Forest obligate | 465.8 | 183.0 | 891.7 | 269.5 | 121.2 | 498.3 | Logistic | Tropical | Mixed |
| 2008 Lees & Peres | Birds | Riparian specialists | 330.3 | 138.8 | 551.3 | 206.0 | 106.5 | 323.7 | Logistic | Tropical | Mixed |
| 2008 Lees & Peres | Mammals | Reference species | 385.5 | 147.9 | 825.8 | 199.4 | 92.2 | 400.2 | Logistic | Tropical | Mixed |
| 2008 Lees & Peres | Mammals | Forest obligate | 546.9 | 148.8 | 1536.5 | 305.2 | 106.6 | 829.5 | Logistic | Tropical | Mixed |
| *2010 Wilkerson et al | Aqua. Inv. | Reference species | NA | NA | NA | 19.2 | -208.0 | 246.5 | Logistic | Temperate | Logging |
| 2011 Perry et al | Birds | Reference species | 175.4 | 119.4 | 286.9 | 79.4 | 54.7 | 134.2 | Logistic | Temperate | Logging |
| 2011 Perry et al | Birds | Forest obligate | 179.2 | 108.1 | 320.2 | 83.5 | 51.7 | 159.3 | Logistic | Temperate | Logging |
| 2014 Gray et al | Terr. Inv. | Reference species | 69.8 | 43.3 | 146.9 | 41.2 | 26.4 | 90.0 | Logistic | Tropical | Cropland |
| 2015 Gray et al | Terr. Inv. | Reference species | 59.2 | 27.3 | 142.2 | 31.2 | 13.0 | 81.3 | Logistic | Tropical | Cropland |
| 2017 Zimbres et al | Mammals | Forest obligate | 211.9 | 45.9 | 606.3 | 98.5 | 37.9 | 266.9 | Logistic | Tropical | Pasture |
| *2018 Maure et al | Birds | Forest obligate | NA | NA | NA | 743.1 | 105.5 | 2716.0 | Mich-Men | Tropical | Mixed |
| 2019 Hansen et al | Birds | Forest obligate | 56.0 | 14.3 | 136.9 | 25.7 | 6.8 | 75.9 | Logistic | Temperate | Pasture |
| 2022 Deere et al | Birds | Reference species | 48.7 | 42.0 | 140.7 | 27.6 | 24.2 | 62.2 | Logistic | Tropical | Cropland |
| 2022 Deere et al | Birds | Forest obligate | 43.2 | 34.7 | 75.2 | 26.1 | 20.9 | 45.5 | Logistic | Tropical | Cropland |
| 2022 Deere et al | Birds | Riparian specialists | 51.5 | 24.9 | 126.0 | 30.8 | 19.9 | 72.7 | Logistic | Tropical | Cropland |
| 2022 Deere et al | Amphibians | Forest obligate | 51.8 | 21.6 | 345.6 | 17.3 | 6.0 | 181.6 | Logistic | Tropical | Cropland |
| **ALL** |  | **Average** | **204** | **61** | **518** | **129** | **36** | **345** |  |  |  |

**Table S15.** Riparian forest buffer width values estimated for different animal groups (Taxa) using different response variables (Metric) fitted with non-linear models. Mean, minimum, and maximum buffer widths for 99% and 90% asymptote were based on model coefficients calculated considering the estimated coefficients for all datasets in Table S9. Notice that Riparian specialists were only classified for birds. N = number of studies used to calculate values. Individual estimations and confidence intervals are provided in Supplementary Table S9.

| **Taxa** | **Metric** | **N** | **Mean99** | **Min99** | **Max99** | **Mean90** | **Min90** | **Max90** |
| --- | --- | --- | --- | --- | --- | --- | --- | --- |
| Amphibians | Forest obligate | 2 | 49 | 47 | 52 | 21 | 17 | 25 |
| Amphibians | Reference species | 1 | 57 | 57 | 57 | 30 | 30 | 30 |
| Aqua. Inv. | Reference species | 2 | 15 | 11 | 19 | 12 | 5 | 19 |
| Birds | Forest obligate | 5 | 297 | 43 | 743 | 230 | 26 | 743 |
| Birds | Reference species | 3 | 252 | 49 | 533 | 138 | 28 | 308 |
| Birds | Riparian specialists | 2 | 191 | 52 | 330 | 118 | 31 | 206 |
| Mammals | Forest obligate | 2 | 379 | 212 | 547 | 202 | 99 | 305 |
| Mammals | Reference species | 1 | 386 | 386 | 386 | 199 | 199 | 199 |
| Terr. Inv. | Reference species | 2 | 65 | 59 | 70 | 36 | 31 | 41 |

**Table S16.** Criteria used for including a study in this meta-analysis.

|  | **Inclusion criteria** |
| --- | --- |
| **1** | Animal communities (excludes single species or populations studies) |
| **2** | Lotic systems - freshwater (excludes lakes, meadows, wetlands and estuaries) |
| **3** | Sampling in the riparian zone or aquatic environment (excludes upland) |
| **4** | Riparian condition assessed as qualitative or quantitative variable |
| **5** | Land use context as qualitative or quantitative variable |
| **6** | Buffer (with forest riparian reserve) vs. No Buffer (with converted riparian areas) in altered landscape |
| **7** | May include reference sites (continuous forest buffer immersed in forest landscape) |
| **8** | Studies assessing buffers immersed in reference site only were excluded |
| **9** | May include riparian buffer width in altered landscapes |
| **10** | Forest Ecoregions only (excluded grasslands, savannas, tundra, desert...) |
| **11** | Excluded studies on restoration |
| **12** | Excluded pseudoreplications (one replication only or all sites in the same river) |
| **13** | At least 3 replications for buffer and no buffer treatments |
| **14** | At least 2 replications for analysis for reference sites (as reference landscapes are rare) |
| **15** | Only empirical/field studies (excluded reviews). Post treatment data only used for field experiment studies. |
