# Supplementary material for: Assessing the effectiveness of riparian buffers in protecting biodiversity
Source: Research Square preprint supplement (doi:10.21203/rs.3.rs-6353341/v1), 2025-05-26
Supplement: Supplementary file 4 [file dfd81482aa0ee72075da364d.xlsx]

## Sheet: Buffer size data
Table S17. Studies and datasets for which riparian buffer size width was available, but model did not fit the data well and thus were not included in the final buffer size calculation (Included = No). See Summary buffer size studies for count of included datasets and studies.
Dataset	Included	Taxa	Approach	Reference
1980 Newbold	No	Aquatic Invertebrates	Reference proportion	Newbold, J. D., Erman, D. C., & Roby, K. B. (1980). Effects of logging on macroinvertebrates in streams with and without buffer strips. Canadian Journal of Fisheries and Aquatic Sciences, 37(7), 1076-1085.
2002 Vesely	Yes	Amphibian	Forest obligate	Vesely, D. G., & McComb, W. C. (2002). Salamander abundance and amphibian species richness in riparian buffer strips in the Oregon Coast Range. Forest Science, 48(2), 291-297.
2002 Vesely	Yes	Amphibian	Reference proportion	Vesely, D. G., & McComb, W. C. (2002). Salamander abundance and amphibian species richness in riparian buffer strips in the Oregon Coast Range. Forest Science, 48(2), 291-297.
2004 Miller et al	No	Small mammal	Forest obligate	Miller, D. A., Thill, R. E., Melchiors, M. A., Wigley, T. B., & Tappe, P. A. (2004). Small mammal communities of streamside management zones in intensively managed pine forests of Arkansas. Forest Ecology and Management, 203(1-3), 381-393.
2004 Miller et al	No	Small mammal	Reference proportion	Miller, D. A., Thill, R. E., Melchiors, M. A., Wigley, T. B., & Tappe, P. A. (2004). Small mammal communities of streamside management zones in intensively managed pine forests of Arkansas. Forest Ecology and Management, 203(1-3), 381-393.
2004 Quinn et al	Yes	Aquatic Invertebrates	Reference proportion	Quinn, J. M., Boothroyd, I. K., & Smith, B. J. (2004). Riparian buffers mitigate effects of pine plantation logging on New Zealand streams: 2. Invertebrate communities. Forest Ecology and Management, 191(1-3), 129-146.
2006 Perkins Hunters	No	Amphibian	Forest obligate	Perkins, D. W., & Hunter Jr, M. L. (2006). Effects of riparian timber management on amphibians in Maine. The Journal of Wildlife Management, 70(3), 657-670.
2006 Perkins Hunters	No	Amphibian	Reference proportion	Perkins, D. W., & Hunter Jr, M. L. (2006). Effects of riparian timber management on amphibians in Maine. The Journal of Wildlife Management, 70(3), 657-670.
2007 Feld Hering	No	Aquatic Invertebrates	Reference proportion	Feld, C. K., & Hering, D. (2007). Community structure or function: effects of environmental stress on benthic macroinvertebrates at different spatial scales. Freshwater Biology, 52(7), 1380-1399.
2007 Moldenke Linden	No	Aquatic Invertebrates	Reference proportion	Moldenke, A. R., & Ver Linden, C. (2007). Effects of clearcutting and riparian buffers on the yield of adult aquatic macroinvertebrates from headwater streams. Forest Science, 53(2), 308-319.
2007 Rykken et al	No	Terrestrial invertebrates	Reference proportion	Rykken, J. J., Moldenke, A. R., & Olson, D. H. (2007). Headwater riparian forest‐floor invertebrate communities associated with alternative forest management practices. Ecological Applications, 17(4), 1168-1183.
2008 Lees & Peres	Yes	Bird	Forest obligate	Lees, A. C., & Peres, C. A. (2008). Conservation value of remnant riparian forest corridors of varying quality for Amazonian birds and mammals. Conservation Biology, 22(2), 439-449.
2008 Lees & Peres	Yes	Bird	Riparian specialists	Lees, A. C., & Peres, C. A. (2008). Conservation value of remnant riparian forest corridors of varying quality for Amazonian birds and mammals. Conservation Biology, 22(2), 439-449.
2008 Lees & Peres	Yes	Bird	Reference proportion	Lees, A. C., & Peres, C. A. (2008). Conservation value of remnant riparian forest corridors of varying quality for Amazonian birds and mammals. Conservation Biology, 22(2), 439-449.
2008 Lees & Peres	Yes	Large mammal	Forest obligate	Lees, A. C., & Peres, C. A. (2008). Conservation value of remnant riparian forest corridors of varying quality for Amazonian birds and mammals. Conservation Biology, 22(2), 439-449.
2008 Lees & Peres	Yes	Large mammal	Reference proportion	Lees, A. C., & Peres, C. A. (2008). Conservation value of remnant riparian forest corridors of varying quality for Amazonian birds and mammals. Conservation Biology, 22(2), 439-449.
2009 Baker et al	No	Terrestrial invertebrates	Reference proportion	Baker, S., Barmuta, L., Grove, S., & Richardson, A. (2009). Are streamside buffers edge-affected habitat for ground-dwelling forest beetle assemblages?. Biodiversity and Conservation, 18, 3467-3482.
2010 Wilkerson et al	Yes	Aquatic Invertebrates	Reference proportion	Wilkerson, E., Hagan, J. M., & Whitman, A. A. (2010). The effectiveness of different buffer widths for protecting water quality and macroinvertebrate and periphyton assemblages of headwater streams in Maine, USA. Canadian Journal of Fisheries and Aquatic Sciences, 67(1), 177-190.
2011 Perry et al	Yes	Bird	Forest obligate	Perry, R. W., Wigley, T. B., Melchiors, M. A., Thill, R. E., Tappe, P. A., & Miller, D. A. (2011). Width of riparian buffer and structure of adjacent plantations influence occupancy of conservation priority birds. Biodiversity and Conservation, 20, 625-642.
2011 Perry et al	Yes	Bird	Reference proportion	Perry, R. W., Wigley, T. B., Melchiors, M. A., Thill, R. E., Tappe, P. A., & Miller, D. A. (2011). Width of riparian buffer and structure of adjacent plantations influence occupancy of conservation priority birds. Biodiversity and Conservation, 20, 625-642.
2013 Foster & Ziegltrum	No	Terrestrial invertebrates	Reference proportion	Foster, A. D., & Ziegltrum, J. (2013). Riparian-associated gastropods in western Washington: community composition and the effects of forest management. Northwest Science, 87(3), 243-256.
2014 Gray et al	Yes	Terrestrial invertebrates	Reference proportion	Gray, C. L., Slade, E. M., Mann, D. J., & Lewis, O. T. (2014). Do riparian reserves support dung beetle biodiversity and ecosystem services in oil palm‐dominated tropical landscapes?. Ecology and Evolution, 4(7), 1049-1060.
2014 Olson et al	No	Amphibian	Forest obligate	Olson, D. H., Leirness, J. B., Cunningham, P. G., & Steel, E. A. (2014). Riparian buffers and forest thinning: Effects on headwater vertebrates 10 years after thinning. Forest Ecology and Management, 321, 81-93.
2014 Olson et al	No	Amphibian	Reference proportion	Olson, D. H., Leirness, J. B., Cunningham, P. G., & Steel, E. A. (2014). Riparian buffers and forest thinning: Effects on headwater vertebrates 10 years after thinning. Forest Ecology and Management, 321, 81-93.
2015 Gray et al	Yes	Terrestrial invertebrates	Reference proportion	Gray, C. L., Lewis, O. T., Chung, A. Y., & Fayle, T. M. (2015). Riparian reserves within oil palm plantations conserve logged forest leaf litter ant communities and maintain associated scavenging rates. Journal of Applied Ecology, 52(1), 31-40.
2017 Garcia-Martinez et al	No	Terrestrial invertebrates	Reference proportion	García-Martínez, M. Á., Valenzuela-González, J. E., Escobar-Sarria, F., López-Barrera, F., & Castaño-Meneses, G. (2017). The surrounding landscape influences the diversity of leaf-litter ants in riparian cloud forest remnants. PloS one, 12(2), e0172464.
2017 Zimbres et al	Yes	Large mammal	Forest obligate	Zimbres, B., Peres, C. A., & Machado, R. B. (2017). Terrestrial mammal responses to habitat structure and quality of remnant riparian forests in an Amazonian cattle-ranching landscape. Biological Conservation, 206, 283-292.
2018 Maure et al	Yes	Bird	Forest obligate	Maure, L. A., Rodrigues, R. C., Alcântara, Â. V., Adorno, B. F., Santos, D. L., Abreu, E. L., ... & Hasui, E. (2018). Functional Redundancy in bird community decreases with riparian forest width reduction. Ecology and Evolution, 8(21), 10395-10408.
2019 Hansen et al	Yes	Bird	Forest obligate	Hansen, B. D., Fraser, H. S., & Jones, C. S. (2019). Livestock grazing effects on riparian bird breeding behaviour in agricultural landscapes. Agriculture, ecosystems & environment, 270, 93-102.
2020 Mullin et al	No	Small mammal	Forest obligate	Mullin, K. E., Yoh, N., Mitchell, S. L., Basrur, S., Seaman, D. J., Bernard, H., & Struebig, M. J. (2020). Riparian reserves promote insectivorous bat activity in oil palm dominated landscapes. Frontiers in Forests and Global Change, 3, 73.
2020 Mullin et al	No	Small mammal	Reference proportion	Mullin, K. E., Yoh, N., Mitchell, S. L., Basrur, S., Seaman, D. J., Bernard, H., & Struebig, M. J. (2020). Riparian reserves promote insectivorous bat activity in oil palm dominated landscapes. Frontiers in Forests and Global Change, 3, 73.
2022 Deere et al	Yes	Amphibian	Forest obligate	Deere, N. J., Bicknell, J. E., Mitchell, S. L., Afendy, A., Baking, E. L., Bernard, H., ... & Struebig, M. J. (2022). Riparian buffers can help mitigate biodiversity declines in oil palm agriculture. Frontiers in Ecology and the Environment, 20(8), 459-474.
2022 Deere et al	Yes	Bird	Forest obligate	Deere, N. J., Bicknell, J. E., Mitchell, S. L., Afendy, A., Baking, E. L., Bernard, H., ... & Struebig, M. J. (2022). Riparian buffers can help mitigate biodiversity declines in oil palm agriculture. Frontiers in Ecology and the Environment, 20(8), 459-475.
2022 Deere et al	Yes	Bird	Riparian specialists	Deere, N. J., Bicknell, J. E., Mitchell, S. L., Afendy, A., Baking, E. L., Bernard, H., ... & Struebig, M. J. (2022). Riparian buffers can help mitigate biodiversity declines in oil palm agriculture. Frontiers in Ecology and the Environment, 20(8), 459-476.
2022 Deere et al	Yes	Bird	Reference proportion	Deere, N. J., Bicknell, J. E., Mitchell, S. L., Afendy, A., Baking, E. L., Bernard, H., ... & Struebig, M. J. (2022). Riparian buffers can help mitigate biodiversity declines in oil palm agriculture. Frontiers in Ecology and the Environment, 20(8), 459-477.
2022 Deere et al	No	Amphibian	Reference proportion	Deere, N. J., Bicknell, J. E., Mitchell, S. L., Afendy, A., Baking, E. L., Bernard, H., ... & Struebig, M. J. (2022). Riparian buffers can help mitigate biodiversity declines in oil palm agriculture. Frontiers in Ecology and the Environment, 20(8), 459-466.
2022 Deere et al	No	Aquatic Invertebrates	Reference proportion	Deere, N. J., Bicknell, J. E., Mitchell, S. L., Afendy, A., Baking, E. L., Bernard, H., ... & Struebig, M. J. (2022). Riparian buffers can help mitigate biodiversity declines in oil palm agriculture. Frontiers in Ecology and the Environment, 20(8), 459-467.
2022 Deere et al	No	Fish	Reference proportion	Deere, N. J., Bicknell, J. E., Mitchell, S. L., Afendy, A., Baking, E. L., Bernard, H., ... & Struebig, M. J. (2022). Riparian buffers can help mitigate biodiversity declines in oil palm agriculture. Frontiers in Ecology and the Environment, 20(8), 459-468.
2022 Deere et al	No	Large mammal	Forest obligate	Deere, N. J., Bicknell, J. E., Mitchell, S. L., Afendy, A., Baking, E. L., Bernard, H., ... & Struebig, M. J. (2022). Riparian buffers can help mitigate biodiversity declines in oil palm agriculture. Frontiers in Ecology and the Environment, 20(8), 459-469.
2022 Deere et al	No	Large mammal	Reference proportion	Deere, N. J., Bicknell, J. E., Mitchell, S. L., Afendy, A., Baking, E. L., Bernard, H., ... & Struebig, M. J. (2022). Riparian buffers can help mitigate biodiversity declines in oil palm agriculture. Frontiers in Ecology and the Environment, 20(8), 459-470.
2022 Deere et al	No	Small mammal	Forest obligate	Deere, N. J., Bicknell, J. E., Mitchell, S. L., Afendy, A., Baking, E. L., Bernard, H., ... & Struebig, M. J. (2022). Riparian buffers can help mitigate biodiversity declines in oil palm agriculture. Frontiers in Ecology and the Environment, 20(8), 459-471.
2022 Deere et al	No	Small mammal	Reference proportion	Deere, N. J., Bicknell, J. E., Mitchell, S. L., Afendy, A., Baking, E. L., Bernard, H., ... & Struebig, M. J. (2022). Riparian buffers can help mitigate biodiversity declines in oil palm agriculture. Frontiers in Ecology and the Environment, 20(8), 459-472.
2022 Deere et al	No	Terrestrial invertebrates	Reference proportion	Deere, N. J., Bicknell, J. E., Mitchell, S. L., Afendy, A., Baking, E. L., Bernard, H., ... & Struebig, M. J. (2022). Riparian buffers can help mitigate biodiversity declines in oil palm agriculture. Frontiers in Ecology and the Environment, 20(8), 459-473.
